# Supplementary material for: Chitosan Coagulation Pretreatment to Enhance Ceramic Water Filtration for Household Water Treatment
Source: MDPI journal article supplement (doi:10.3390/ijms22189736), 2021-09-08

## Supporting Information: Chitosan Coagulation Pretreatment to Enhance Ceramic Water Filtration for Household Water Treatment

**Authors:** Collin Knox Coleman<sup>1</sup>, Eric Mai<sup>1</sup>, Megan Miller<sup>1</sup>, Shalini Sharma<sup>1</sup>, Clark Williamson<sup>1</sup>, Hemali Oza<sup>2</sup>, Eleanor Holmes<sup>1</sup>, Marie Lamer<sup>1</sup>, Christopher Ly<sup>1</sup>, Jill Stewart<sup>1</sup>, and Mark D. Sobsey<sup>1</sup>, and Lydia S. Abebe<sup>3</sup>

<sup>1</sup> Department of Environmental Sciences and Engineering, Gillings School of Global Public Health, University of North Carolina, Chapel Hill, NC 27599, USA

<sup>2</sup> Gangarosa Department of Environmental Health, Rollins School of Public Health, Emory University, Atlanta, GA 30033, USA

<sup>3</sup> Center for Environment, Energy and Infrastructure, U.S. Agency for International Development (USAID), 1300 Pennsylvania Avenue, NW Washington, D.C.

\*Author to whom correspondence should be addressed; E-Mail: [Cwrobert@live.unc.edu](mailto:Cwrobert@live.unc.edu)

### Supporting Information:

**Table S1:** Statistical significance of chitosan pretreatment and filtration as compared to filtration only for Chitosan Acetate and Chitosan Lactate 30 mg/L doses in a natural surface water amended with 1% sewage

**Table S2:** Physical and chemical water quality parameters for October through January surface waters collected from University Lake, Carrboro, NC.

**Table S3:** *E. coli* KO11 log reductions for surface water with chitosan pretreatment and ceramic filtration (CWF), control filter, and control and pre-chitosan experimental influent concentrations.

**Table S4:** MS2 Coliphage log reductions for surface water with chitosan pretreatment and ceramic filtration (CWF), control filter, and control and pre-chitosan experimental influent concentrations.

**Table S5:** Turbidity (NTU) reductions for surface water with chitosan pretreatment and ceramic filtration (CWF), control filter, and control and pre-chitosan experimental influent.

**Table S6:** Microbial log reductions for test waters pretreated with chitosan prior to filtration. Samples were taken from the middle of the water column 30 minutes after chitosan coagulation-flocculation and before test water was passed through CWF.

**Figure S1:** Ceramic disc molding apparatus consisting of a hydraulic press and aluminum disc mold for the formation of ceramic filter discs

Table S1: Statistical significance of chitosan pretreatment and filtration as compared to filtration only for Chitosan Acetate and Chitosan Lactate 30 mg/L doses in a natural surface water amended with 1% sewage

| Test           | Comparison                                                  | Organism              | Sum of Ranks | p-value | Number of Samples (N) |
|----------------|-------------------------------------------------------------|-----------------------|--------------|---------|-----------------------|
| Mann-Whitney U | Natural Water +1% Sewage (30 mg/L Chitosan <b>Acetate</b> ) | MS2 Coliphage         | 45           | <0.0001 | 9                     |
|                | Natural Water +1% Sewage (No Chitosan)                      |                       | 108          |         | 8                     |
| Mann-Whitney U | Natural Water +1% Sewage (30 mg/L Chitosan <b>Acetate</b> ) | <i>C. perfringens</i> | 48           | 0.0012  | 9                     |
|                | Natural Water +1% Sewage (No Chitosan)                      |                       | 88           |         | 7                     |
| Mann-Whitney U | Natural Water +1% Sewage (30 mg/L Chitosan <b>Acetate</b> ) | <i>E. coli</i>        | 28           | 0.0003  | 7                     |
|                | Natural Water +1% Sewage (No Chitosan)                      |                       | 92           |         | 8                     |
| Mann-Whitney U | Natural Water +1% Sewage (30 mg/L Chitosan <b>Lactate</b> ) | MS2 Coliphage         | 45           | <0.0001 | 8                     |
|                | Natural Water +1% Sewage (No Chitosan)                      |                       | 108          |         | 9                     |
| Mann-Whitney U | Natural Water +1% Sewage (30 mg/L Chitosan <b>Lactate</b> ) | <i>C. perfringens</i> | 51           | 0.0052  | 9                     |
|                | Natural Water +1% Sewage (No Chitosan)                      |                       | 85           |         | 7                     |
| Mann-Whitney U | Natural Water +1% Sewage (30 mg/L Chitosan <b>Lactate</b> ) | <i>E. coli</i>        | 21           | 0.0007  | 6                     |
|                | Natural Water +1% Sewage (No Chitosan)                      |                       | 84           |         | 8                     |

Table S2: Physical and chemical water quality parameters for October through January surface waters collected from University Lake, Carrboro, NC.

| Parameter                    | Average± Std. Dev | Unit       | Sample # |
|------------------------------|-------------------|------------|----------|
| Turbidity                    | 25.49±10.35       | NTU        | n = 9    |
| pH                           | 7.35±0.28         | --         | n = 9    |
| Orthophosphate as Phosphorus | <0.10±0.00        | mg/L       | n = 14   |
| UV Absorbance at 254 nm      | 0.12±0.03         | cm-1       | n = 8    |
| Dissolved Organic Carbon     | 4.80±0.28         | mg/L       | n = 8    |
| Total Organic Carbon         | 5.93±0.37         | mg/L       | n = 15   |
| <i>E. coli</i>               | 26.34±49.59       | MPN/100 mL | n = 62   |
| Total Coliform               | 1596.03±2020.16   | MPN/100 mL | n = 62   |

Table S3: *E. coli* KO11 log reductions for surface water with chitosan pretreatment and ceramic filtration (CWF), control filter, and control and pre-chitosan experimental influent concentrations.

| Influent/Effluent Assayed     | Day 14  | Day 27  | Day 34  | Day 43  | Day 50  | Day 56  | Day 64  | Day 71  |
|-------------------------------|---------|---------|---------|---------|---------|---------|---------|---------|
| Pre-chitosan In (CFU/100 mL)  | 1.9E+07 | 7.0E+07 | 4.8E+06 | 2.4E+06 | 1.2E+07 | 8.4E+06 | 1.2E+07 | 2.0E+07 |
| Control Influent (CFU/100 mL) | 2.1E+07 | 7.0E+07 | 4.8E+06 | 3.0E+06 | 2.2E+07 | 2.2E+07 | 1.9E+07 | 2.7E+07 |
| Control CWF (LogNt/N0)        | -1.83   | -2.87   | -2.73   | -2.41   | -2.10   | -3.47   | -1.46   | -1.33   |
| Effluent CWF - A (LogNt/N0)   | -7.40   | -4.19   | -6.68   | -5.60   | -6.59   | -7.22   | -6.71   | -5.29   |
| Effluent CWF - B (LogNt/N0)   | -5.07   | -7.07   | -5.68   | -5.38   | -7.07   | -7.22   | -7.37   | -6.11   |
| Effluent CWF - C (LogNt/N0)   | -6.87   | -7.97   | -6.21   | -5.44   | -6.77   | -7.22   | -6.41   | -5.83   |

Table S4: MS2 Coliphage log reductions for surface water with chitosan pretreatment and ceramic filtration (CWF), control filter, and control and pre-chitosan experimental influent concentrations.

| Influent/Effluent Assayed     | Day 14  | Day 27  | Day 34  | Day 43  | Day 50  | Day 56  | Day 64  | Day 71  |
|-------------------------------|---------|---------|---------|---------|---------|---------|---------|---------|
| Pre-chitosan In (PFU/100 mL)  | 1.0E+08 | 3.3E+05 | 7.7E+05 | 9.4E+06 | 8.8E+06 | 2.5E+06 | 1.7E+07 | 9.4E+07 |
| Control Influent (PFU/100 mL) | 1.4E+08 | 2.3E+05 | 4.5E+04 | 1.3E+05 | 8.0E+06 | 7.0E+06 | 4.1E+08 | 2.4E+08 |
| Control CWF (LogNt/N0)        | 0.06    | 0.32    | -1.35   | 0.21    | 0.38    | -0.13   | -0.45   | -0.45   |
| Effluent CWF - A (LogNt/N0)   | -6.26   | -3.10   | -5.11   | -5.27   | -4.96   | -4.00   | -5.41   | -4.94   |
| Effluent CWF - B (LogNt/N0)   | -6.66   | -3.87   | -5.19   | -3.99   | -4.15   | -4.18   | -4.31   | -4.68   |
| Effluent CWF - C (LogNt/N0)   | -6.14   | -4.10   | -5.04   | -3.94   | -4.39   | -3.96   | -4.01   | -4.45   |

Table S5: Turbidity (NTU) reductions for surface water with chitosan pretreatment and ceramic filtration (CWF), control filter, and control and pre-chitosan experimental influent.

| Influent/Effluent Assayed | Day 14 | Day 27 | Day 34 | Day 43 | Day 50 | Day 56 | Day 64 | Day 71 |
|---------------------------|--------|--------|--------|--------|--------|--------|--------|--------|
| Pre-chitosan In (NTU)     | 17.7   | 17.6   | 17.8   | 22.5   | 16.9   | 20.9   | 35.1   | 44.4   |
| Control Influent (NTU)    | 11.6   | 11.7   | 14.7   | 35.2   | 24.1   | 30.6   | 31.3   | 43.5   |
| Control CWF (NTU)         | 2.7    | --     | 1.83   | 0.489  | 1.03   | 4.46   | 0.784  | 1.92   |
| Effluent CWF - A (NTU)    | 2.65   | --     | 1.16   | 0.755  | 0.581  | 1.34   | 1.82   | 2.12   |
| Effluent CWF - B (NTU)    | 2.11   | --     | 0.553  | 0.704  | 0.975  | 4.47   | 1.86   | 1.07   |
| Effluent CWF - C (NTU)    | 1.99   | --     | 2.31   | 1.64   | 1.35   | 2.93   | 1.99   | 3.35   |

Table S6: Microbial log reductions for test waters pretreated with chitosan prior to filtration. Samples were taken from the middle of the water column 30 minutes after chitosan coagulation-flocculation and before test water was passed through CWF.

| Chitosan Concentration<br>(No Filtration) | Test Water<br>Composition     | <i>C. perfringens</i><br>Log <sub>10</sub> Reduction | <i>E. coli</i> Log <sub>10</sub><br>Reduction | MS2 Log <sub>10</sub><br>Reduction |
|-------------------------------------------|-------------------------------|------------------------------------------------------|-----------------------------------------------|------------------------------------|
| <b>Chitosan Acetate</b>                   |                               |                                                      |                                               |                                    |
| 10 mg/L                                   | Natural Water (No<br>Sewage)  | --4.67                                               | -3.04                                         | -2.30                              |
| 10 mg/L                                   | Natural Water +<br>1% Sewage  | -3.81                                                | -2.36                                         | -3.16                              |
| 30 mg/L                                   | Natural Water (No<br>Sewage)  | -3.58                                                | -0.18                                         | -2.28                              |
| 30 mg/L                                   | Natural Water +<br>1% Sewage  | -4.69                                                | -0.70                                         | -1.34                              |
| 30 mg/L                                   | Natural Water +<br>10% Sewage | -3.73                                                | --                                            | -1.30                              |
| 30 mg/L                                   | PBS<br>(No Sewage)            | -0.49                                                | -1.75                                         | -2.78                              |
| <b>Chitosan Lactate</b>                   |                               |                                                      |                                               |                                    |
| 10 mg/L                                   | Natural Water (No<br>Sewage)  | -4.27                                                | -2.40                                         | -2.51                              |
| 10 mg/L                                   | Natural Water +<br>1% Sewage  | -3.33                                                | -1.72                                         | -3.93                              |
| 30 mg/L                                   | Natural Water (No<br>Sewage)  | -3.41                                                | -1.40                                         | -2.22                              |
| 30 mg/L                                   | Natural Water +<br>1% Sewage  | -3.92                                                | -1.99                                         | -1.87                              |
| 30 mg/L                                   | Natural Water +<br>10% Sewage | -3.57                                                | -0.78                                         | -2.74                              |
| 30 mg/L                                   | PBS<br>(No Sewage)            | -0.77                                                | -1.90                                         | -3.16                              |

Figure S1: Ceramic disc molding apparatus consisting of a hydraulic press and aluminum disc mold for the formation of ceramic filter discs

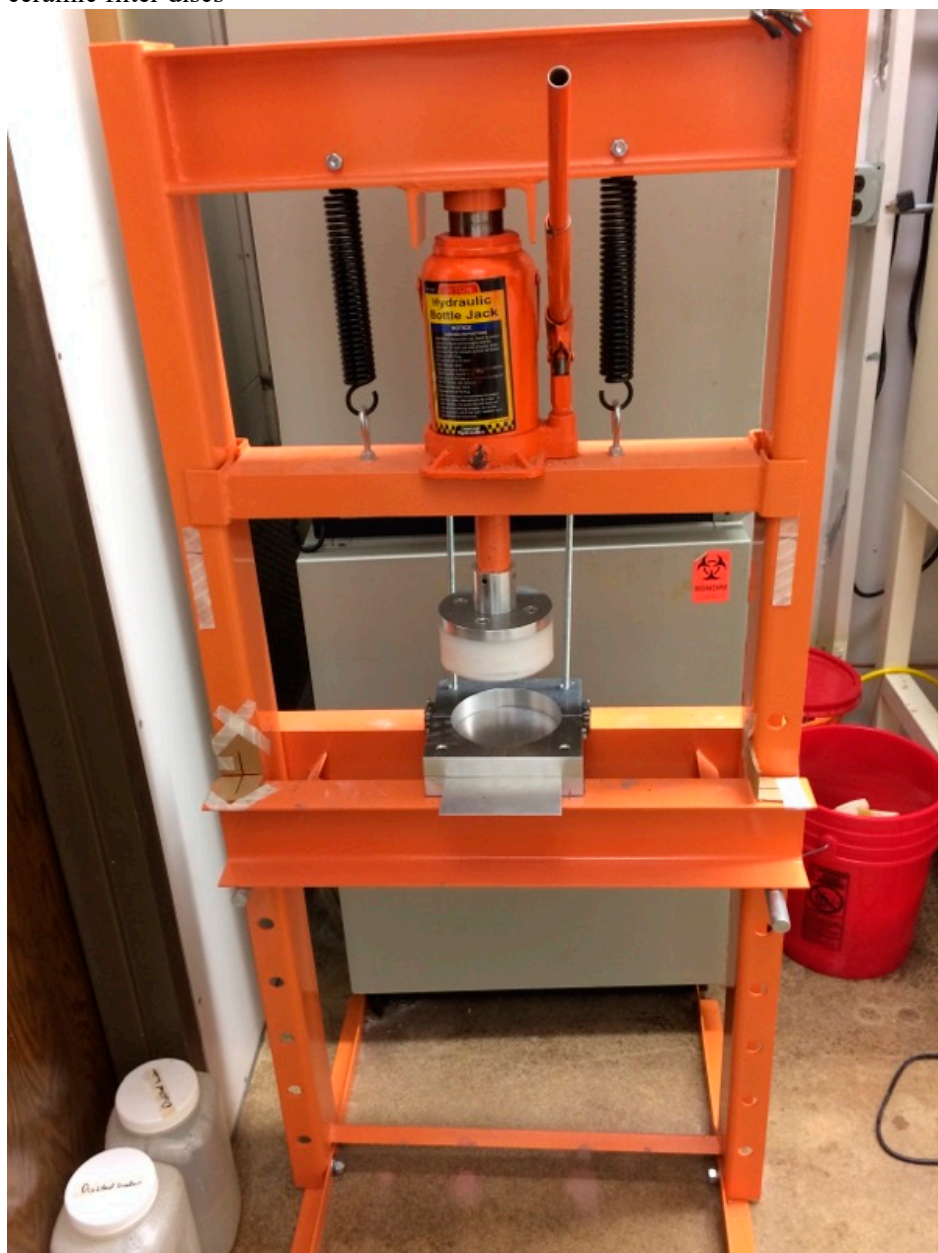

Supplement: s1 [file s1]
